# Supplementary material for: Detection and Prediction of Neurodegenerative Disorders by Long Noncoding RNA Signature Analysis among Bangladeshi Population
Source: Hindawi journal article supplement (doi:10.1155/2023/9416281), 2023-01-01
Supplement: f1 [file 9416281.f1.docx]

**Table S1: Parkinson’s Disease:** **Temperatures and cycles for RTPCR for HOTAIR**

| **Steps** | **Temperature** | **Duration** | **Cycle** |
| --- | --- | --- | --- |
| 1 | 95⁰C | 1min | 1 |
| 2 | 95⁰C | 15sec | 45 |
| 56.5⁰C | 35sec |
| 3 | 25⁰C | 10sec | 1 |

**Table S2: Parkinson’s Disease:** **Temperatures and cycles for RTPCR for MKRN2-42:1**

| Steps | Temperature | Duration | Cycle |
| --- | --- | --- | --- |
| 1 | 95⁰C | 1min | 1 |
| 2 | 95⁰C | 15sec | 45 |
| 56.75⁰C | 35sec |
| 3 | 25⁰C | 10sec | 1 |

**Table S3: Motor Neuron’s Disease:** **Temperatures and cycles for RTPCR for *Meg3v1***

| Steps | Temperature | Duration | Cycle |
| --- | --- | --- | --- |
| 1 | 95⁰C | 1min | 1 |
| 2 | 95⁰C | 15sec | 45 |
| 56.6⁰C | 35sec |
| 3 | 25⁰C | 10sec | 1 |

**Table S4: Motor Neuron’s Disease:** **Temperatures and cycles for RTPCR for** **NEAT1**

| Steps | Temperature | Duration | Cycle |
| --- | --- | --- | --- |
| 1 | 95⁰C | 1min | 1 |
| 2 | 95⁰C | 15sec | 45 |
| 60.5⁰C | 35sec |
| 3 | 25⁰C | 10sec | 1 |

**Table S5: The list of forward and reverse primers that have been used for 4 specific lncRNAs and Internal Control**

| Disease | Name of LncRNA | Primers |
| --- | --- | --- |
| Parkinson’s | HOTAIR | Forward: 5’-GAGGGGAGCAGAGTTCAAGT-3’ |
| Reverse: 5’-TGGGAGGCAGCAATAGACAA-3’ |
| MKRN2-42:1 | Forward: 5′-AGG TGG GAG GAT CGC TTG A-3′ |
| Reverse: 5′-ACC ATA TTG ATG CCG AAC TTA GTG-3′ |
| MND | Meg3v1 | Forward: 5’-GCTTCTCGAGGCCTGTCTAC-3’ |
| Reverse: 5’-GAACCTGAGCACAACAGCAA-3’ |
| NEAT1 | Forward:5’-GCCTTGTAGATGGAGCTTGC-3’ |
| Reverse: 5’-GCACAACACAATGACACCCT-3’ |
| Internal Control | GAPDH | Forward:5’- TGACGTGCCGCCTGGAGAAC-3’ |
| Reverse:5’- CCGGCATCGAAGGTGGAAGAG-3’ |
